1 **The plasma proteome of plant-based diets: analyses of 1463 proteins in 50,000 people.**

2 Tammy Y.N. Tong<sup>1</sup>, Karl Smith-Byrne<sup>1</sup>, Keren Papier<sup>1</sup>, Joshua R. Atkins<sup>1</sup>, Mahboubeh

3 Parsaeian<sup>1</sup>, Timothy J. Key<sup>1</sup> and Ruth C. Travis<sup>1</sup>

4 *1. Cancer Epidemiology Unit, Nuffield Department of Population Health, University of*

5 *Oxford, Oxford, UK*

6

7 Corresponding author: Tammy Y.N. Tong

8 Postal address: Cancer Epidemiology Unit, University of Oxford, Richard Doll Building, Old

9 Road Campus, Oxford, OX3 7LF

10 Tel: +44 (0) 1865 289653

11 Email: [tammy.tong@ndph.ox.ac.uk](mailto:tammy.tong@ndph.ox.ac.uk)

## 12 **Abstract**

13 *Background and objectives:* Circulating proteins are integral to many biological processes.

14 We aimed to assess differences in the plasma proteome between people of different dietary  
15 groups defined by degree of animal food consumption.

16 *Methods:* The UK Biobank recruited middle-aged adults (mostly 40 to 69 years) throughout  
17 the UK between 2006-2010. Relative concentrations of 1463 plasma proteins were quantified  
18 using the Olink Proximity Extension Assay on blood samples from 49,326 participants, who  
19 were also asked to report their ethnicity and consumption of red and processed meat, poultry,  
20 fish, dairy and eggs. We defined six diet groups among the white British participants (23,116  
21 regular meat eaters, 23,323 low meat eaters, 484 poultry eaters, 1074 fish eaters, 722  
22 vegetarians, and 54 vegans), and two diet groups among the British Indians (390 meat eaters  
23 and 163 vegetarians). We used multivariable-adjusted linear regressions to assess differences  
24 in protein concentrations between diet groups, with correction for multiple testing.

25 *Results:* We observed significant differences in many plasma proteins by diet group (683  
26 proteins in white British participants, 1 in British Indians), in particular many proteins that  
27 are majority expressed in the digestive system. Of the biggest differences, compared with  
28 regular meat eaters, the non-meat eaters had significantly higher FGF21 (e.g. +0.40 SD in  
29 vegetarians), GUCA2A (+0.33), FOLR1 (+0.32), IGFBP2 (+0.31) and DSG2 (+0.30); all  
30 groups except the vegans had lower HAVCR1 (-0.38 in vegetarians). The observed  
31 differences were generally similar in direction in both ethnicities.

32 *Discussion:* In this first comprehensive assessment of plasma proteins by diet group, we  
33 identified many differences in proteins between groups defined by animal food consumption;  
34 this variation in protein levels suggests differences in various biological activities, including

35 gastrointestinal tract and kidney function, which may relate to differences in future disease

36 risk.

37 *Keywords:* vegetarians, vegans, proteomics

## 38 **Introduction**

39 Proteins are essential for many bodily functions including supporting cell and tissue growth  
40 and structural integrity, and for enabling a range of enzymatic, biochemical, signalling and  
41 transport functions across different systems in the human body. Proteomics describes the  
42 large-scale study of multiple proteins and their interconnected pathways, the investigation of  
43 which allows a more comprehensive understanding of disease mechanisms [1]. Protein  
44 expression can be altered by environmental factors [2], including diet, which is an important  
45 exogenous source of dietary protein, and which provides the nine essential amino acids that  
46 cannot be synthesised endogenously but are nonetheless necessary for protein synthesis in the  
47 human body. Previous studies have shown that differences in dietary habits can substantially  
48 impact dietary intakes of protein and both dietary intakes and circulating concentrations of  
49 amino acids [3]. However, there is scant evidence on how diet may affect the proteome,  
50 partly due to the limited availability of proteomics data in large scale studies, and no prior  
51 studies have investigated how vegetarian and vegan diets may influence the proteome.  
52 Nonetheless, protein levels have an established role in the aetiology of multiple diseases [4],  
53 and the examination of dietary influences on the proteome may offer unique insights into  
54 understanding how vegetarian and vegan diets may affect future disease risk.

55 The aim of this study is to provide a detailed description of circulating protein concentrations  
56 in people with varying degrees of animal food consumption, using data from the UK  
57 Biobank.

58

## 59 **Methods**

60 *Study Population*

61 The UK Biobank is a prospective cohort study of around 500,000 middle-aged people  
62 (recruitment target 40-69 years), recruited from across the United Kingdom between 2006  
63 and 2010. The scientific rationale and design of the UK Biobank have been described in  
64 detail previously [5]. In brief, participants were identified from National Health Service  
65 registers, and were invited to join the study if they lived within travelling distance (~25 km)  
66 of one of the 22 assessment centres in England, Wales and Scotland. People who consented  
67 to participate in the study attended a baseline visit at the assessment centre where they  
68 completed a touchscreen questionnaire which asked about their lifestyle (including diet,  
69 alcohol consumption, smoking status, physical activity), socio-demographic characteristics  
70 and general health and medical history. All participants were also given a verbal interview,  
71 and had their physical measurements and blood samples taken by trained staff. Permission for  
72 access to patient records for recruitment was approved by the Patient Information Advisory  
73 Group (now the National Information Governance Board for Health and Social Care) in  
74 England and Wales and the Community Health Index Advisory Group in Scotland, and all  
75 participants gave informed consent to participate using a signature capture device at the  
76 baseline visit.

77

### 78 *Ethnicity classification*

79 On the touchscreen questionnaire, participants were asked to self-identify their ethnicity as  
80 ‘White’, ‘Mixed’, ‘Asian or Asian British’, ‘Black or Black British’, ‘Chinese’, ‘Other ethnic  
81 group’, ‘Do not know’, or ‘Prefer not to answer’, with further sub-categories under each  
82 option. Participants were included for our analyses if they self-identified as ‘White’, or as  
83 ‘Asian or Asian British’ and subsequently as ‘Indian’, hereafter referred to as ‘white British’  
84 and ‘British Indian’. The white British population was included as it made up the majority of

85 the participants in UK Biobank, while the British Indian population was included because of  
86 the large proportion of vegetarians in this population group (25% compared to less than 2%  
87 in the overall population). The number of vegetarians in the other ethnic groups was too small  
88 to allow valid comparisons by diet groups, and therefore people of other ethnic groups were  
89 excluded from these analyses.

90

### 91 *Diet group classification*

92 Participants were classified into diet groups based on self-reported dietary data from the  
93 touchscreen questionnaire completed at recruitment. Participants were asked to report their  
94 frequency of consumption of processed meat (including processed poultry), unprocessed red  
95 meat (beef, lamb or mutton, pork), unprocessed poultry (such as chicken or turkey), oily fish,  
96 and other types of fish, with the possible responses ranging from “never” to “once or more  
97 daily”. Participants were also asked whether they never consumed dairy and eggs or foods  
98 containing eggs. Based on their responses to these questions, the white British participants  
99 were classified into six diet groups: regular meat eaters (red and processed meat consumption  
100 >3 times per week), low meat eaters (red and processed meat consumption  $\leq 3$  times per  
101 week), poultry eaters (participants who ate unprocessed poultry but no red and processed  
102 meat), fish eaters (participants who ate fish, but not red and processed meat, or poultry),  
103 vegetarians (participants who did not eat any meat or fish), and vegans (participants who did  
104 not eat any meat, fish, dairy products or eggs). The British Indian participants were classified  
105 into two diet groups: meat eaters (ate any combination of red or processed meat or poultry)  
106 and vegetarians; the numbers of fish eaters and vegans were low in the British Indians, and  
107 thus were not included in these analyses.

108

109 *Assay for plasma proteins*

110 Non-fasting blood samples were collected from all UK Biobank participants by trained  
111 personnel (either a phlebotomist or a nurse) except in a small proportion (0.3%) of  
112 participants who declined, were deemed unable to, or where the attempt was abandoned for  
113 technical or health reasons. Proteomic profiling was conducted using the Olink Proximity  
114 Extension Assay on blood plasma samples in 54,306 participants selected as part of the UK  
115 Biobank Pharma Proteomics Project (UKB-PPP). The samples were shipped on dry ice to  
116 Olink Analyses Service, Uppsala, Sweden for analysis; details of the selection procedures for  
117 inclusion in UKB-PPP and the technical details of the proteomics assays have been described  
118 elsewhere [6]. In brief, the Olink Explore 1536 platform used in this study is an antibody-  
119 based assay which measures the relative abundance of 1,472 protein analytes, including 1,463  
120 unique proteins, distributed across four 384-plex panels: inflammation, oncology,  
121 cardiometabolic, and neurology. The Olink Explore platform is based on proximity extension  
122 assays that are highly sensitive and reproducible with low cross-reactivity. Relative  
123 concentrations of the 1,463 unique proteins were readout by next-generation sequencing.  
124 Measurements are expressed as normalized protein expression (NPX) values which are log-  
125 base-2 transformed. Protein values below the limit of detection (LOD) were replaced with the  
126 LOD divided by the square root of 2 [7]. Protein concentrations were subsequently inverse  
127 rank normal transformed. All results for differences in protein concentrations by diet groups  
128 may be interpreted as SD differences.

129

130 *Inclusion and exclusion criteria*

131 Of the 54,306 participants selected for proteomic profiling, 52,705 participants remained after  
132 the quality control procedures. Participants were further excluded if they were not of white

133 British or British Indian ethnicity (n=2964), could not be classified into one of the pre-  
134 specified diet groups (n=414), or had missing information for fasting time (n=1). After the  
135 exclusions, 49,326 participants (48,773 white British and 553 British Indian) were included  
136 in the analyses. A participant flow chart of the inclusion criteria is shown in **Supplementary**  
137 **figure 1**.

138

### 139 *Statistical analyses*

140 Baseline characteristics of UK Biobank participants included in these analyses were tabulated  
141 by six diet groups in the white British population and by two diet groups in the British Indian  
142 population, as mean (SD) for continuous variables and number (%) for categorical variables.  
143 We used multivariable-adjusted linear regressions to estimate differences in protein  
144 concentrations by diet group, separately by ethnicity, using regular meat eaters as a reference  
145 group in the white British participants, and meat eaters as a reference group in the British  
146 Indians. The model was adjusted for age at recruitment (5 year categories), sex, region  
147 (London, North-West England, North-East England, Yorkshire, West Midlands, East  
148 Midlands, South-East England, South-West England, Wales, Scotland), fasting status (0–1, 2,  
149 3, 4, 5, 6–7,  $\geq 8$  hours), body mass index (BMI;  $<20$ , 20.0–22.4, 22.5–24.9, 25.0–27.4, 27.5–  
150 29.9, 30.0–32.4, 32.5–34.9,  $\geq 35$  kg/m<sup>2</sup>, unknown), alcohol consumption ( $<1$ , 1–7, 8–15,  $\geq 16$   
151 g/d, unknown), smoking status (never, previous, current  $<15$  cigarettes/day, current  $\geq 15$   
152 cigarettes/d, unknown) and physical activity ( $<10$ , 10–49.9,  $\geq 50$  excess metabolic equivalent  
153 of task, hr/wk, unknown). Wald tests were used to assess overall heterogeneity between diet  
154 group in each ethnicity, and for pairwise comparisons of each of the other diet groups  
155 compared to the reference group (regular meat eaters in white British participants/meat eaters  
156 in British Indians). Heterogeneity between vegetarians and vegans in the white British



157 population was assessed based on post-estimation linear combinations of parameters for all  
158 proteins.

159 To account for multiple testing while considering the high correlations between the  
160 circulating proteins, we conducted a principal component analysis of the circulating proteins  
161 in the complete proteins dataset before exclusions for these analyses, and determined that the  
162 first 639 principal components explained 95% of the total variation in the exposure data.  
163 Consequently, the effective number of independent tests [8] was determined to be 639, and  
164 the statistical significance level was set to be  $p\text{-value } 0.05/639 = 0.000078$ . For the top  
165 proteins identified (the top 10 significant proteins in each pairwise comparison against the  
166 reference group, based on ranking of p-values), we conducted additional sensitivity analyses  
167 to evaluate the extent to which the associations may be influenced by key covariates  
168 including BMI, smoking and alcohol consumption, by presenting models with and without  
169 adjustment of these variables. Additionally, we also restricted the analyses to people who  
170 self-reported to be in good and excellent health. All analyses were performed using Stata  
171 version 17.0 (StataCorp, TX, USA). All figures were generated using R version 4.2.1, the  
172 forest plots using “Jasper makes plots” package version 2-266 [9].

173

#### 174 *Integrating publicly available information on gene expression*

175 To further understand the biological context for the proteins of interest, we extracted single  
176 cell mRNA expression from the Human Protein Atlas [10] to describe expression for any  
177 proteins that were significantly different in one or more comparisons. Normalized expression  
178 levels were extracted for genes in 30 different human tissues and 82 cell-types. Gene  
179 expression specificity at the cell or tissue type level was calculated as the ratio of each gene  
180 cell-type or tissue expression to the total expression of each gene across all cell or tissue

181 types. We subsequently identified genes for proteins that were majority expressed (more than  
182 50% of total expression) in at least one cell or tissue type, and mapped these to their likely  
183 candidate cell and tissue of origin where possible.

184

## 185 **Results**

### 186 *Baseline characteristics*

187 The baseline characteristics of the study population are shown by ethnicity and diet group in  
188 Table 1. Compared with white British regular meat eaters, the non-meat eaters were on  
189 average slightly younger, more likely to be women, and to reside in London. They were less  
190 likely to be overweight, reported lower alcohol consumption, lower current smoking, and  
191 more physical activity. Compared with British Indian meat eaters, the vegetarians were more  
192 likely to be women and reported lower alcohol consumption, lower current smoking and  
193 slightly lower physical activity, but BMI was not noticeably different between the two  
194 groups. Fasting time was not meaningfully different by diet group in both ethnicities.

195

### 196 *Differences in plasma proteins by diet group*

197 The plasma proteins that were significantly different in white British vegetarians and vegans  
198 compared with regular meat eaters are shown as volcano plots in **Figure 1**. Significant  
199 differences in proteins in white British low meat eaters, poultry eaters and fish eaters  
200 compared with regular meat eaters, and in British Indian vegetarians compared with meat  
201 eaters are shown as volcano plots in **Supplementary figures 2-6**. Overall, 683 plasma  
202 proteins were significantly different by diet group (based on p-heterogeneity < 0.000078) in  
203 the white British participants, including 535 plasma proteins that were significantly different

204 in one or more pairwise comparisons between regular meat eaters and at least one of the other  
205 diet groups. This includes 296 proteins (23 higher, 273 lower) in low meat eaters compared  
206 with regular meat eaters, 59 (9 higher, 50 lower) in poultry eaters, 157 (104 higher, 53 lower)  
207 in fish eaters, 219 (194 higher, 25 lower) in vegetarians and 15 (12 higher, 3 lower) in  
208 vegans; and 2 proteins were significantly different between vegetarians and vegans (AHSP  
209 and FOLR2 were both higher in vegans). The proteins identified are involved in a range of  
210 different biological pathways. Of the 535 plasma proteins that were significantly different in  
211 one or more pairwise comparisons, 97 are majority expressed (protein mRNA >50% of total  
212 body mRNA expression) in one tissue type, while the other proteins have limited tissue  
213 specificity. In particular, these included 39 proteins that are majority expressed in the  
214 digestive system (including 16 in the liver, 8 in the pancreas, 8 in the small intestine), 30 in  
215 the nervous system (27 in the brain), and 12 in the respiratory system (7 in the lung)  
216 (**Supplementary figure 7**).

217 In the British Indian population, only 1 protein (SUMF2, which is higher in vegetarians) was  
218 significantly different when comparing vegetarians and meat eaters, likely owing to the much  
219 smaller number of British Indians in the study. However, the differences in many proteins  
220 were directly consistent between the two ethnicities, as illustrated by the forest plots of top  
221 proteins by diet group and ethnicity, with the six diet groups in the white British participants  
222 and the two diet groups in British Indians (**Figures 2-3, Supplementary figures 8-10**). The  
223 complete results of all proteins are shown in **Supplementary tables 1**.

224 Generally, in the multivariable-adjusted model, many proteins showed a gradient effect in  
225 magnitude of differences across diet groups by degree of animal food exclusion, from regular  
226 meat eaters to vegans. Figure 2 shows the top 10 proteins in white British vegetarians (based  
227 on the ranking of pairwise p-values in vegetarians compared with regular meat eaters), and  
228 Figure 3 shows the top 10 proteins in white British vegans. Of the top proteins in vegetarians

229 (Figure 2), compared with regular meat eaters, vegetarians and vegans both had significantly  
230 higher FGF21 (+0.40 SD in vegetarians; +0.74 SD in vegans), GUCA2A (+0.33; +0.79),  
231 FOLR1 (+0.32; +0.61) and IGFBP2 (+0.31; +0.55) after correction for multiple testing,  
232 whereas vegetarians but not vegans had significantly higher ART3 (+0.34), LAYN (+0.32),  
233 PCSK9 (+0.32), and lower CDHR2 (-0.26), HAVCR1 (-0.38) and CNDP1 (-0.39). In  
234 addition to the aforementioned proteins, vegans also had substantially higher FOLR2 (+0.69),  
235 GAS6 (+0.68), DSG2 (+0.68), THY1 (+0.62), MANSC1 (+0.58), but lower EGFR (-0.55)  
236 than regular meat eaters (Figure 3); the differences in these proteins were directionally  
237 consistent but less extreme in the vegetarians.

238 The top 10 proteins in white British low meat eaters, poultry eaters and fish eaters compared  
239 with regular meat eaters are shown in Supplementary figures 8, 9 and 10 respectively. Of  
240 these top proteins, none was uniquely different in one diet group only when compared with  
241 regular meat eaters. Similar to the observations in vegetarians, all three groups had  
242 substantially higher DSG2 and lower HAVCR1 compared with regular meat eaters; in both  
243 low meat eaters and poultry eaters HAVCR1 is the protein that exhibited the largest  
244 magnitude in difference across all proteins, while in fish eaters FGF23 showed the biggest  
245 difference. In addition, low meat eaters and poultry eaters both had lower OSM and CD99L2,  
246 the latter of which was higher in vegetarians. Low meat eaters, fish eaters and vegetarians all  
247 had lower ACP5 than regular meat eaters; this protein was lower but not significantly  
248 different in poultry eaters. In sensitivity analyses of the top proteins with different levels of  
249 covariate adjustment and limited to people of good and excellent health, results were similar  
250 (**Supplementary tables 2**).

251

252 **Discussion**

253 In this large British cohort, we observed differences in the levels of many proteins by diet  
254 group. This is the first comprehensive study on plant-based diets and plasma proteomics, and  
255 many of the substantial differences reported here are novel. In particular, we saw substantial  
256 differences in some proteins potentially associated with disease states such as HAVCR1 and  
257 DSG2 (associated with kidney disease [11] and inflammatory bowel disease, IBD [12],  
258 respectively), as well as proteins associated with nutritional status including IGFBP2 [13,  
259 14], and possibly FGF21 [15] and the folate receptors FOLR1 and FOLR2 [16]. The  
260 magnitudes of differences in many proteins showed a gradient effect across the diet groups,  
261 and were directionally consistent between the white British and British Indian populations.

262 In terms of tissue mRNA expression, most of the proteins identified are not majority  
263 expressed in one specific tissue type, which suggests that they may be involved in a range of  
264 biochemical pathways and processes. Of the 97 proteins that were significantly different by  
265 diet group and also majority expressed in one tissue type, many were identified to be those  
266 expressed in the digestive system, which may signify dietary impact on digestive functions.  
267 We also see a number of proteins with high expression in the brain and lung, which may  
268 benefit from further research. Overall, the substantial differences in the protein  
269 concentrations observed likely reflect physiological differences between the different diet  
270 groups, as well as differences in underlying disease pathology and future disease risk.

271 No previous studies were found that examined plasma proteomics in vegetarians and vegans.  
272 A few previous studies have reported on proteomic profiles by other dietary patterns,  
273 including the Dietary Approaches to Stop Hypertension (DASH) diet, the Healthy Eating  
274 Index and the Mediterranean diet, as well as other data derived dietary patterns [17–20].  
275 Whilst vegetarian and vegan diets share some common features with these other healthy  
276 dietary patterns, such as higher intakes of fruit, vegetables and whole grains, the diets are also  
277 inherently different in many other aspects. For example, while both the DASH diet and

278 Mediterranean diet recommend reducing red and processed meat consumption, they generally  
279 do not pose any restrictions on consumption of fish and fish products, or dairy products  
280 (particularly low-fat versions). In contrast, vegetarian and vegan diets are defined by the  
281 complete exclusion of animal food groups. Therefore, it is not surprising that while studies on  
282 the DASH diet also reported higher FOLR2 [17] and DSG2 [18] in people with higher  
283 adherence, we generally do not find similarities in the results.

284

### 285 *FGF21*

286 There are only a limited number of studies examining vegetarian and vegan diets with  
287 individual proteins. In support of our findings, higher concentrations of FGF21 in vegetarians  
288 and vegans have been shown in a small study of 36 each of omnivores, vegetarians and  
289 vegans [21]. FGF21 has been hypothesised to be high in vegans as a downstream effect of  
290 low intake of methionine [15], an essential amino acid that is known to be limiting in vegan  
291 diets [3]. Studies of FGF21 administration in rodents have found favourable effects on  
292 adiposity, lipid profiles, and non-alcohol fatty liver disease, but possible adverse effects on  
293 bone homeostasis [22]; randomised trials of FGF21 analogues also support the reduction in  
294 triglycerides [23] and improvement of fibrosis in patients with non-alcoholic steatohepatitis  
295 [24]. Consistent with these observations, we have previously reported lower BMI and body  
296 fat [25], more favourable lipid profiles [26] and lower heart disease risk [27], but also lower  
297 bone mineral density [25] and higher fracture risk [28] in vegetarians and vegans when  
298 compared with meat eaters; another study has reported lower odds of non-alcohol fatty liver  
299 disease in vegetarians than non-vegetarians [29].

300

### 301 *GUCA2A*

302 GUCA2A was substantially higher in all diet groups compared to regular meat eaters, with  
303 the exception of low meat eaters. GUCA2A activates the Guanylate Cyclase C receptor,  
304 which has a role in the maintenance of gut physiology including the increase of water  
305 movement into the intestinal lumen [30]. Previous studies have found that fasting plasma  
306 levels of GUCA2A are significantly lower in patients who have been diagnosed with Crohn's  
307 disease compared with healthy controls [31], and that loss of GUCA2A expression may be an  
308 important determinant of colorectal cancer [32]. Consistent with the observations in this  
309 study, a previous EPIC-Oxford study reported a higher frequency of bowel movements in  
310 vegetarians and vegans [33].

311

### 312 *FOLR1 and FOLR2*

313 We found both FOLR1 and FOLR2 to be higher in non-meat eaters, with vegans having  
314 particularly high levels. As folate receptors, FOLR1 and FOLR2 both bind to and import folic  
315 acid into cells, and are usually downregulated with repletion of folate, however, this process  
316 may also be mediated by homocysteine in a positive direction [16]. While vegetarians and  
317 vegans typically have high folate, they may also have high homocysteine due to low vitamin  
318 B12 intakes [34, 35], though no other studies have reported on folate receptor expression in  
319 vegetarians and vegans for comparison.

320

### 321 *IGFBP2*

322 Similar to our findings, a previous study in EPIC-Oxford has found that compared with meat-  
323 eaters, both vegetarians and vegans had higher concentrations of IGFBP2, a binding protein  
324 for IGF-1 [13]. The mechanism for higher IGFBP2 in vegetarians and vegans is not well  
325 established but has been suggested to be related to lower dietary intakes of essential amino

326 acids [13], protein (especially from dairy) [14], or lower total energy intake [36], which are  
327 all characteristic of vegetarian and vegan diets [3, 25, 37].

328

329 *DSG2*

330 Low and non-meat eaters, particularly vegans, had higher DSG2 in the current study. DSG2  
331 belongs to the family of desmosomal cadherins, which includes both desmogleins (DSGs)  
332 and desmocollins (DSCs), with DSG2 and DSC2 being the major isoforms in humans, and  
333 the only isoforms expressed in the intestinal epithelium [12]. Consistently, the current study  
334 also showed that DSC2 was higher in non-meat eaters particularly vegans. Though the two  
335 proteins are structurally and functionally similar, laboratory evidence in mouse models  
336 suggest that DSG2 may have a more prominent role in the maintenance of the integrity of the  
337 intestinal epithelial barrier than DSC2 [38]. In humans, several small studies on IBD patients  
338 have found that lower intestinal protein levels of DSG2 in IBD patients, suggesting a role of  
339 the protein in IBD pathogenesis [12].

340

341 *HAVCR1*

342 HAVCR1 has been recognised as a biomarker of kidney injury and possibly an early  
343 diagnostic marker of kidney disease [11]. In mice, high-fat diets or the saturated fatty acid  
344 palmitate have been shown to upregulate expression of HAVCR1 in the proximal tubules of  
345 the kidney [39–41]. In humans, vegetarians and vegans tend to have lower intake of saturated  
346 fat, which is consistent with the observation of lower HAVCR1 in the non-meat eaters  
347 (though not significantly so in vegans) in the current study. Additionally, high protein diets,  
348 especially diets high in protein from animal sources, have been suggested to have adverse  
349 effects on kidney health [42]. A previous study suggested a lower risk of chronic kidney



350 disease in vegetarians after accounting for baseline risk of diabetes and hypertension [43].  
351 Furthermore, as HAVCR1 is expressed on the surface of immune cells, it is also believed to  
352 have a role regulating immune responses via activation and proliferation of immune cells  
353 [11].

354

### 355 *PCSK9*

356 The observation of higher PCSK9 in vegetarians is of interest. PCSK9 is a well-established  
357 drug target for treating hypercholesterolaemia, whereby PCSK9 inhibitors lowers low-  
358 density-lipoprotein cholesterol (LDL-C) concentrations by preventing the binding of PCSK9  
359 to LDL receptors, which subsequently enables the LDL receptors to bind and remove LDL-C  
360 from the bloodstream instead [44, 45]. As a result, higher PCSK9 is often accompanied by  
361 high LDL-C, whereas the vegetarians in the current [26] and other studies [46] typically have  
362 significantly lower LDL-C, likely partly due to vegetarians having lower saturated fat intake  
363 [47]. It may therefore be plausible that the relatively higher PCSK9 expression in people with  
364 low LDL-C may be related to maintaining the minimum level of LDL-C necessary to support  
365 cellular function and structural integrity, but further studies are needed to confirm this.

366

### 367 *Other proteins*

368 The functions of many other proteins identified are not well established. CNDP1 is a  
369 dipeptidase, and one previous study reported higher CNDP1 in people on high protein diets  
370 [48], which would be consistent with our observation of lower CNDP1 in non-meat eaters  
371 (not statistically significant in vegans) who generally have lower protein intake. Several of  
372 the proteins identified such as ART3, GAS6, THY1 and EGFR are involved in a range of  
373 signalling pathways and progression of tumour tissues [49–52], while other proteins

374 including LAYN and CDHR2 are believed to have roles in cell adhesion [53, 54]. AHSP,  
375 which was significantly higher in vegans than vegetarians, has a role in stabilising  
376 haemoglobin and its loss of function has been linked to inherited anaemia [55], but its  
377 relevance for nutritional anaemia is unclear. Overall, the reasons that these proteins appear to  
378 be influenced by diet and their implications require further research. As the first study on diet  
379 group and a large panel of circulating proteins, the current study focused on the biggest  
380 differences by diet groups, and many other differences were observed that could not be  
381 described in detail, but still deserve further investigation. The study demonstrates the utility  
382 of investigating protein differences by diet groups; future research should measure these and  
383 other proteins using multiple technologies in relation to dietary factors, to replicate and  
384 expand on our findings.

385

### 386 *Strengths and limitations*

387 The key strength of this study was that it showed for first time differences in circulating  
388 proteins between people of different habitual diet groups in a large population, and many of  
389 the findings were completely novel. We have defined six diet groups in the white British  
390 population and two diet groups in the British Indian population, which allowed a detailed  
391 comparison by both dietary habits and ethnicity. Of the limitations, as with all observational  
392 studies, some level of self-selection bias may be present, which limits the generalisability of  
393 the findings. While we have adjusted for several important confounders, residual  
394 confounding by other dietary and non-dietary factors may still be present, though sensitivity  
395 analyses showed that results were consistent across all adjustment models. We are also  
396 unable to infer causality due to the cross-sectional nature of the studies.

397

398 *Conclusions*

399 In this large population-based cohort in the United Kingdom, many differences in circulating  
400 protein concentrations were observed between different diet groups. These proteins are  
401 involved in a range of different biological pathways and processes, particularly related to  
402 gastrointestinal tract and kidney function. These differences likely reflect physiological  
403 differences between the different diet groups, and the implications of these differences for  
404 future disease risk require further investigation.

405 **References**

- 406 1. Cui M, Cheng C, Zhang L (2022) High-throughput proteomics: a methodological  
407 mini-review. *Lab Invest* 102:1170–1181. <https://doi.org/10.1038/s41374-022-00830-7>
- 408 2. Al-Amrani S, Al-Jabri Z, Al-Zaabi A, et al (2021) Proteomics: Concepts and  
409 applications in human medicine. *World J Biol Chem* 12:57–69.  
410 <https://doi.org/10.4331/wjbc.v12.i5.57>
- 411 3. Schmidt JA, Rinaldi S, Scalbert A, et al (2016) Plasma concentrations and intakes of  
412 amino acids in male meat-eaters, fish-eaters, vegetarians and vegans: a cross-sectional  
413 analysis in the EPIC-Oxford cohort. *Eur J Clin Nutr* 70:306–312.  
414 <https://doi.org/10.1038/ejcn.2015.144>
- 415 4. Pietzner M, Wheeler E, Carrasco-Zanini J, et al (2021) Mapping the proteo-genomic  
416 convergence of human diseases. *Science* (80- ) 374:.  
417 <https://doi.org/10.1126/science.abj1541>
- 418 5. Fry A, Littlejohns TJ, Sudlow C, et al (2017) Comparison of sociodemographic and  
419 health-related characteristics of UK Biobank participants with those of the general  
420 population. *Am J Epidemiol* 186:1026–1034. <https://doi.org/10.1093/aje/kwx246>

- 421 6. Sun B, Chiou J, Traylor M, et al (2022) Genetic regulation of the human plasma  
422 proteome in 54,306 UK Biobank participants. bioRxiv.  
423 <https://doi.org/10.1101/2022.06.17.496443>
- 424 7. Albanes D, Alcalá K, Alcalá N, et al (2023) The blood proteome of imminent lung  
425 cancer diagnosis. *Nat Commun* 14:3042. <https://doi.org/10.1038/s41467-023-37979-8>
- 426 8. Gao X, Starmer J, Martin ER (2008) A multiple testing correction method for genetic  
427 association studies using correlated single nucleotide polymorphisms. *Genet*  
428 *Epidemiol* 32:361–369. <https://doi.org/10.1002/gepi.20310>
- 429 9. Arnold M (2022) Jasper: Jasper makes plots. 2020
- 430 10. Thul PJ, Lindskog C (2018) The human protein atlas: A spatial map of the human  
431 proteome. *Protein Sci* 27:233–244. <https://doi.org/10.1002/pro.3307>
- 432 11. Liu S, Tang W, Cao J, et al (2022) A Comprehensive Analysis of HAVCR1 as a  
433 Prognostic and Diagnostic Marker for Pan-Cancer. *Front Genet* 13:1–11.  
434 <https://doi.org/10.3389/fgene.2022.904114>
- 435 12. Schlegel N, Boerner K, Waschke J (2021) Targeting desmosomal adhesion and  
436 signalling for intestinal barrier stabilization in inflammatory bowel diseases—Lessons  
437 from experimental models and patients. *Acta Physiol* 231:1–15.  
438 <https://doi.org/10.1111/apha.13492>
- 439 13. Allen NE, Appleby PN, Davey GK, et al (2002) The associations of diet with serum  
440 insulin-like growth factor I and its main binding proteins in 292 women meat-eaters,  
441 vegetarians, and vegans. *Cancer Epidemiol Biomarkers Prev* 11:1441–1448
- 442 14. Crowe FL, Key TJ, Allen NE, et al (2009) The association between diet and serum  
443 concentrations of IGF-I, IGFBP-1, IGFBP-2, and IGFBP-3 in the European

- 444 Prospective Investigation into Cancer and Nutrition. *Cancer Epidemiol Biomarkers*  
445 *Prev* 18:1333–1340. <https://doi.org/10.1158/1055-9965.EPI-08-0781>
- 446 15. McCarty MF (2017) The moderate essential amino acid restriction entailed by low-  
447 protein vegan diets may promote vascular health by stimulating FGF21 secretion.  
448 *Horm Mol Biol Clin Investig* 30:1–9. <https://doi.org/10.1515/hmbci-2015-0056>
- 449 16. Antony AC, Tang YS, Khan RA, et al (2004) Translational upregulation of folate  
450 receptors is mediated by homocysteine via RNA-heterogeneous nuclear  
451 ribonucleoprotein E1 interactions. *J Clin Invest* 113:285–301.  
452 <https://doi.org/10.1172/JCI200411548>
- 453 17. Kim H, Lichtenstein AH, Ganz P, et al (2023) Identification of Protein Biomarkers of  
454 the Dietary Approaches to Stop Hypertension Diet in Randomized Feeding Studies and  
455 Validation in an Observational Study. *J Am Heart Assoc* 12:e028821.  
456 <https://doi.org/10.1161/JAHA.122.028821>
- 457 18. Du S, Chen J, Kim H, et al (2023) Plasma Protein Biomarkers of Healthy Dietary  
458 Patterns: Results from the Atherosclerosis Risk in Communities Study and the  
459 Framingham Heart Study. *J Nutr* 153:34–46.  
460 <https://doi.org/10.1016/j.tjnut.2022.11.008>
- 461 19. Walker ME, Song RJ, Xu X, et al (2020) Proteomic and metabolomic correlates of  
462 healthy dietary patterns: The framingham heart study. *Nutrients* 12:1–20.  
463 <https://doi.org/10.3390/nu12051476>
- 464 20. Warensjö Lemming E, Byberg L, Stattin K, et al (2019) Dietary Pattern Specific  
465 Protein Biomarkers for Cardiovascular Disease: A Cross-Sectional Study in 2  
466 Independent Cohorts. *J Am Heart Assoc* 8:. <https://doi.org/10.1161/JAHA.118.011860>

- 467 21. Castaño-Martinez T, Schumacher F, Schumacher S, et al (2019) Methionine restriction  
468 prevents onset of type 2 diabetes in NZO mice. *FASEB J* 33:7092–7102.  
469 <https://doi.org/10.1096/fj.201900150R>
- 470 22. Geng L, Lam KSL, Xu A (2020) The therapeutic potential of FGF21 in metabolic  
471 diseases: from bench to clinic. *Nat Rev Endocrinol* 16:654–667.  
472 <https://doi.org/10.1038/s41574-020-0386-0>
- 473 23. Bhatt DL, Bays HE, Miller M, et al (2023) The FGF21 analog pegozafermin in severe  
474 hypertriglyceridemia: a randomized phase 2 trial. *Nat Med* 29:.  
475 <https://doi.org/10.1038/s41591-023-02427-z>
- 476 24. Loomba R, Sanyal AJ, Kowdley K V., et al (2023) Randomized, Controlled Trial of  
477 the FGF21 Analogue Pegozafermin in NASH. *N Engl J Med* 1–11.  
478 <https://doi.org/10.1056/nejmoa2304286>
- 479 25. Tong TY, Key TJ, Sobiecki JG, Bradbury KE (2018) Anthropometric and physiologic  
480 characteristics in white and British Indian vegetarians and nonvegetarians in the UK  
481 Biobank. *Am J Clin Nutr* 107:909–920. <https://doi.org/10.1093/ajcn/nqy042>
- 482 26. Tong TYN, Perez-Cornago A, Bradbury KE, Key TJ (2021) Biomarker Concentrations  
483 in White and British Indian Vegetarians and Nonvegetarians in the UK Biobank. *J*  
484 *Nutr* 151:3168–3179. <https://doi.org/10.1093/jn/nxab192>
- 485 27. Tong TYN, Appleby PN, Bradbury KE, et al (2019) Risks of ischaemic heart disease  
486 and stroke in meat eaters, fish eaters, and vegetarians over 18 years of follow-up:  
487 results from the prospective EPIC-Oxford study. *BMJ* 366:l4897.  
488 <https://doi.org/10.1136/bmj.l4897>
- 489 28. Tong TYN, Appleby PN, Armstrong MEG, et al (2020) Vegetarian and vegan diets

- 490 and risks of total and site-specific fractures: results from the prospective EPIC-Oxford  
491 study. *BMC Med* 18:353. <https://doi.org/10.1186/s12916-020-01815-3>
- 492 29. Chiu T, Lin M-N, Pan W-H, et al (2018) Vegetarian diet, food substitution, and  
493 nonalcoholic fatty liver. *Tzu Chi Med J* 30:102.  
494 [https://doi.org/10.4103/tcmj.tcmj\\_109\\_17](https://doi.org/10.4103/tcmj.tcmj_109_17)
- 495 30. Dye FS, Larraufie P, Kay R, et al (2019) Characterisation of proguanylin expressing  
496 cells in the intestine – evidence for constitutive luminal secretion. *Sci Rep* 9:1–20.  
497 <https://doi.org/10.1038/s41598-019-52049-0>
- 498 31. von Volkmann HL, Brønstad I, Tronstad RR, et al (2020) Plasma levels of guanylins  
499 are reduced in patients with Crohn’s disease. *Scand J Gastroenterol* 55:449–453.  
500 <https://doi.org/10.1080/00365521.2020.1748224>
- 501 32. Wilson C, Lin JE, Li P, et al (2014) The paracrine hormone for the GUCY2C tumor  
502 suppressor, guanylin, is universally lost in colorectal cancer. *Cancer Epidemiol*  
503 *Biomarkers Prev* 23:2328–2337. <https://doi.org/10.1158/1055-9965.EPI-14-0440>
- 504 33. Sanjoaquin MA, Appleby PN, Spencer EA, Key TJ (2004) Nutrition and lifestyle in  
505 relation to bowel movement frequency: a cross-sectional study of 20 630 men and  
506 women in EPIC–Oxford. *Public Health Nutr* 7:77–83.  
507 <https://doi.org/10.1079/phn2003522>
- 508 34. Gilsing AMJ, Crowe FL, Lloyd-Wright Z, et al (2010) Serum concentrations of  
509 vitamin B12 and folate in British male omnivores, vegetarians and vegans: results  
510 from a cross-sectional analysis of the EPIC-Oxford cohort study. *Eur J Clin Nutr*  
511 64:933–939. <https://doi.org/10.1038/ejcn.2010.142>
- 512 35. Hung CJ, Huang PC, Lu SC, et al (2002) Plasma homocysteine levels in Taiwanese

- 513 vegetarians are higher than those of omnivores. *J Nutr* 132:152–158.  
514 <https://doi.org/10.1093/jn/132.2.152>
- 515 36. Kaaks R, Bellati C, Venturelli E, et al (2003) Effects of dietary intervention on IGF-I  
516 and IGF-binding proteins, and related alterations in sex steroid metabolism: The Diet  
517 and Androgens (DIANA) Randomised Trial. *Eur J Clin Nutr* 57:1079–1088.  
518 <https://doi.org/10.1038/sj.ejcn.1601647>
- 519 37. Sobiecki JG, Appleby PN, Bradbury KE, Key TJ (2016) High compliance with dietary  
520 recommendations in a cohort of meat eaters, fish eaters, vegetarians, and vegans:  
521 Results from the European Prospective Investigation into Cancer and Nutrition-Oxford  
522 study. *Nutr Res* 36:464–477. <https://doi.org/10.1016/j.nutres.2015.12.016>
- 523 38. Gross A, Pack LAP, Schacht GM, et al (2018) Desmoglein 2, but not desmocollin 2,  
524 protects intestinal epithelia from injury. *Mucosal Immunol* 11:1630–1639.  
525 <https://doi.org/10.1038/s41385-018-0062-z>
- 526 39. Yu Y, Mo H, Zhuo H, et al (2022) High Fat Diet Induces Kidney Injury via  
527 Stimulating Wnt/ $\beta$ -Catenin Signaling. *Front Med* 9:1–9.  
528 <https://doi.org/10.3389/fmed.2022.851618>
- 529 40. Zhao X, Chen X, Zhang Y, et al (2019) Kidney injury molecule-1 is upregulated in  
530 renal lipotoxicity and mediates palmitate-induced tubular cell injury and inflammatory  
531 response. *Int J Mol Sci* 20:. <https://doi.org/10.3390/ijms20143406>
- 532 41. Mori Y, Ajay AK, Chang JH, et al (2021) KIM-1 mediates fatty acid uptake by renal  
533 tubular cells to promote progressive diabetic kidney disease. *Cell Metab* 33:1042-  
534 1061.e7. <https://doi.org/10.1016/j.cmet.2021.04.004>
- 535 42. Ko GJ, Rhee CM, Kalantar-Zadeh K, Joshi S (2020) The effects of high-protein diets



- 536 on kidney health and longevity. *J Am Soc Nephrol* 31:1667–1679.  
537 <https://doi.org/10.1681/ASN.2020010028>
- 538 43. Liu H-W, Tsai W-H, Liu J-S, Kuo K-L (2019) Association of Vegetarian Diet with  
539 Chronic Kidney Disease. *Nutrients* 11:279. <https://doi.org/10.3390/nu11020279>
- 540 44. Schmidt AF, Holmes M V, Preiss D, et al (2019) Phenome-wide association analysis  
541 of LDL- cholesterol lowering genetic variants in. 1–10
- 542 45. Horton JD, Cohen JC, Hobbs HH (2007) Molecular biology of PCSK9: its role in LDL  
543 metabolism. *Trends Biochem Sci* 32:71–77. <https://doi.org/10.1016/j.tibs.2006.12.008>
- 544 46. Bradbury KE, Crowe FL, Appleby PN, et al (2014) Serum concentrations of  
545 cholesterol, apolipoprotein A-I and apolipoprotein B in a total of 1694 meat-eaters,  
546 fish-eaters, vegetarians and vegans. *Eur J Clin Nutr* 68:178–183.  
547 <https://doi.org/10.1038/ejcn.2013.248>
- 548 47. Mensink RP, Zock PL, Kester AD, Katan MB (2003) Effects of dietary fatty acids and  
549 carbohydrates on the ratio of serum total to HDL cholesterol and on serum lipids and  
550 apolipoproteins: a meta- - analysis of 60 controlled trials. *Am J Clin Nutr* 77:1146–  
551 1155. <https://doi.org/11778166>
- 552 48. Franzke B, Bileck A, Unterberger S, et al (2022) The plasma proteome is favorably  
553 modified by a high protein diet but not by additional resistance training in older adults:  
554 A 17-week randomized controlled trial. *Front Nutr* 9:.  
555 <https://doi.org/10.3389/fnut.2022.925450>
- 556 49. Tan L, Song X, Sun X, et al (2016) ART3 regulates triple-negative breast cancer cell  
557 function via activation of Akt and ERK pathways. *Oncotarget* 7:46589–46602.  
558 <https://doi.org/10.18632/oncotarget.10306>

- 559 50. Tanaka M, Siemann DW (2020) Gas6/Axl signaling pathway in the tumor immune  
560 microenvironment. *Cancers (Basel)* 12:1–14. <https://doi.org/10.3390/cancers12071850>
- 561 51. Hagood JS (2019) Thy-1 as an Integrator of Diverse Extracellular Signals. *Front Cell  
562 Dev Biol* 7:1–5. <https://doi.org/10.3389/fcell.2019.00026>
- 563 52. Wee P, Wang Z (2017) Epidermal growth factor receptor cell proliferation signaling  
564 pathways. *Cancers (Basel)* 9:1–45. <https://doi.org/10.3390/cancers9050052>
- 565 53. Pan J hua, Zhou H, Cooper L, et al (2019) LAYN is a prognostic biomarker and  
566 correlated with immune infiltrates in gastric and colon cancers. *Front Immunol* 10:1–  
567 12. <https://doi.org/10.3389/fimmu.2019.00006>
- 568 54. Pinette JA, Mao S, Millis BA, et al (2019) Brush border protocadherin CDHR2  
569 promotes the elongation and maximized packing of microvilli in vivo. *Mol Biol Cell*  
570 30:108–118. <https://doi.org/10.1091/mbc.E18-09-0558>
- 571 55. Yu X, Kong Y, Dore LC, et al (2007) An erythroid chaperone that facilitates folding of  
572  $\alpha$ -globin subunits for hemoglobin synthesis. *J Clin Invest* 117:1856–1865.  
573 <https://doi.org/10.1172/JCI31664>
- 574

575 Funding: The work is supported by the UK Medical Research Council (MR/M012190/1),  
576 Wellcome Trust Our Planet Our Health (Livestock, Environment and People, LEAP  
577 205212/Z/16/Z) and Cancer Research UK (C8221/A29017 and C8221/A29186). TYNT is  
578 support by a Nuffield Departmental of Population Health Fellowship. The funders had no role  
579 in study design, data collection, analysis, decision to publish, or preparation of the  
580 manuscript.

581 Acknowledgements: This research has been conducted using UK Biobank Resource under  
582 application 67506.

583 Competing interests: The authors had no conflicts of interest.

584 Author's contributions: TYNT, TJK and RCT conceived and designed the research question.  
585 KSB conducted quality control of the proteomics data. TYNT analyzed the data and wrote  
586 the first draft of the manuscript. All authors provided input on data analysis and interpretation  
587 of results, revised the manuscript critically for important intellectual content, and read and  
588 approved the final manuscript.

**Table 1:** Baseline characteristics of white British and British Indian participants by diet groups in UK Biobank.

|                                           | White British participants      |                             |                         |                        |                      |                | British Indian participants |                      |
|-------------------------------------------|---------------------------------|-----------------------------|-------------------------|------------------------|----------------------|----------------|-----------------------------|----------------------|
|                                           | Regular meat eaters<br>N=23,116 | Low meat eaters<br>N=23,323 | Poultry eaters<br>N=484 | Fish eaters<br>N=1,074 | Vegetarians<br>N=722 | Vegans<br>N=54 | Meat eaters<br>N=390        | Vegetarians<br>N=163 |
| <b>Age at recruitment</b>                 | 57.2 (8.2)                      | 57.2 (8.0)                  | 56.6 (8.1)              | 54.4 (8.2)             | 52.9 (8.1)           | 55.0 (7.8)     | 53.9 (8.6)                  | 54.7 (7.7)           |
| <b>Sex</b>                                |                                 |                             |                         |                        |                      |                |                             |                      |
| Women                                     | 9,810<br>(42.4%)                | 14,861<br>(63.7%)           | 389 (80.4%)             | 756 (70.4%)            | 483 (66.9%)          | 28 (51.9%)     | 170 (43.6%)                 | 102 (62.6%)          |
| Men                                       | 13,306<br>(57.6%)               | 8,462<br>(36.3%)            | 95 (19.6%)              | 318 (29.6%)            | 239 (33.1%)          | 26 (48.1%)     | 220 (56.4%)                 | 61 (37.4%)           |
| <b>Region of assessment centre</b>        |                                 |                             |                         |                        |                      |                |                             |                      |
| London                                    | 2,558<br>(11.1%)                | 2,797<br>(12.0%)            | 80 (16.5%)              | 191 (17.8%)            | 121 (16.8%)          | 8 (14.8%)      | 208 (53.3%)                 | 88 (54.0%)           |
| North-West England                        | 3,957<br>(17.1%)                | 3,577<br>(15.3%)            | 77 (15.9%)              | 136 (12.7%)            | 108 (15.0%)          | 13 (24.1%)     | 24 (6.2%)                   | 8 (4.9%)             |
| North-East England                        | 2,830<br>(12.2%)                | 3,011<br>(12.9%)            | 58 (12.0%)              | 93 (8.7%)              | 67 (9.3%)            | 3 (5.6%)       | 12 (3.1%)                   | 4 (2.5%)             |
| Yorkshire                                 | 3,792<br>(16.4%)                | 3,764<br>(16.1%)            | 68 (14.0%)              | 193 (18.0%)            | 111 (15.4%)          | 10 (18.5%)     | 35 (9.0%)                   | 10 (6.1%)            |
| West Midlands                             | 1,957 (8.5%)                    | 1,929 (8.3%)                | 38 (7.9%)               | 83 (7.7%)              | 60 (8.3%)            | 6 (11.1%)      | 59 (15.1%)                  | 22 (13.5%)           |
| East Midlands                             | 1,863 (8.1%)                    | 1,889 (8.1%)                | 38 (7.9%)               | 84 (7.8%)              | 60 (8.3%)            | 4 (7.4%)       | 15 (3.8%)                   | 15 (9.2%)            |
| South-East England                        | 1,764 (7.6%)                    | 1,790 (7.7%)                | 28 (5.8%)               | 69 (6.4%)              | 57 (7.9%)            | 5 (9.3%)       | 17 (4.4%)                   | 9 (5.5%)             |
| South-West England                        | 1,698 (7.3%)                    | 1,871 (8.0%)                | 38 (7.9%)               | 103 (9.6%)             | 60 (8.3%)            | 4 (7.4%)       | 10 (2.6%)                   | 3 (1.8%)             |
| Wales                                     | 882 (3.8%)                      | 1,084 (4.6%)                | 23 (4.8%)               | 53 (4.9%)              | 35 (4.8%)            | 0 (0.0%)       | 5 (1.3%)                    | 3 (1.8%)             |
| Scotland                                  | 1,815 (7.9%)                    | 1,611 (6.9%)                | 36 (7.4%)               | 69 (6.4%)              | 43 (6.0%)            | 1 (1.9%)       | 5 (1.3%)                    | 1 (0.6%)             |
| <b>Fasting time (hours)</b>               | 3.8 (2.5)                       | 3.7 (2.3)                   | 3.8 (2.2)               | 3.6 (2.3)              | 3.7 (2.4)            | 3.8 (3.0)      | 4.1 (2.4)                   | 4.1 (2.5)            |
| <b>Body mass index (kg/m<sup>2</sup>)</b> |                                 |                             |                         |                        |                      |                |                             |                      |
| <20                                       | 358 (1.5%)                      | 548 (2.3%)                  | 35 (7.2%)               | 65 (6.1%)              | 45 (6.2%)            | 5 (9.3%)       | 6 (1.5%)                    | 3 (1.8%)             |
| 20.0–22.4                                 | 5,911<br>(25.6%)                | 7,659<br>(32.8%)            | 219 (45.2%)             | 503 (46.8%)            | 338 (46.8%)          | 29 (53.7%)     | 121 (31.0%)                 | 52 (31.9%)           |
| 22.5-24.9                                 | 10,239                          | 9,936                       | 159 (32.9%)             | 379 (35.3%)            | 251 (34.8%)          | 13 (24.1%)     | 180 (46.2%)                 | 71 (43.6%)           |

|                                       |                   |                   |             |             |             |            |             |             |
|---------------------------------------|-------------------|-------------------|-------------|-------------|-------------|------------|-------------|-------------|
|                                       | (44.3%)           | (42.6%)           |             |             |             |            |             |             |
| ≥25                                   | 6,513<br>(28.2%)  | 5,105<br>(21.9%)  | 68 (14.0%)  | 123 (11.5%) | 87 (12.0%)  | 7 (13.0%)  | 80 (20.5%)  | 35 (21.5%)  |
| Unknown                               | 95 (0.4%)         | 75 (0.3%)         | 3 (0.6%)    | 4 (0.4%)    | 1 (0.1%)    | 0 (0.0%)   | 3 (0.8%)    | 2 (1.2%)    |
| <b>Alcohol consumption</b>            |                   |                   |             |             |             |            |             |             |
| <1g/d                                 | 3,600<br>(15.6%)  | 4,540<br>(19.5%)  | 151 (31.2%) | 255 (23.7%) | 169 (23.4%) | 27 (50.0%) | 156 (40.0%) | 139 (85.3%) |
| 1-7g/d                                | 5,075<br>(22.0%)  | 6,721<br>(28.8%)  | 152 (31.4%) | 293 (27.3%) | 200 (27.7%) | 9 (16.7%)  | 96 (24.6%)  | 18 (11.0%)  |
| 8-15g/d                               | 4,986<br>(21.6%)  | 5,521<br>(23.7%)  | 76 (15.7%)  | 235 (21.9%) | 166 (23.0%) | 7 (13.0%)  | 52 (13.3%)  | 6 (3.7%)    |
| ≥16g/d                                | 9,439<br>(40.8%)  | 6,525<br>(28.0%)  | 105 (21.7%) | 291 (27.1%) | 186 (25.8%) | 11 (20.4%) | 84 (21.5%)  | 0 (0.0%)    |
| Unknown                               | 16 (0.1%)         | 16 (0.1%)         | 0 (0.0%)    | 0 (0.0%)    | 1 (0.1%)    | 0 (0.0%)   | 2 (0.5%)    | 0 (0.0%)    |
| <b>Smoking status</b>                 |                   |                   |             |             |             |            |             |             |
| Never                                 | 11,729<br>(50.7%) | 12,933<br>(55.5%) | 268 (55.4%) | 597 (55.6%) | 422 (58.4%) | 29 (53.7%) | 291 (74.6%) | 148 (90.8%) |
| Previous                              | 8,557<br>(37.0%)  | 8,178<br>(35.1%)  | 179 (37.0%) | 389 (36.2%) | 237 (32.8%) | 20 (37.0%) | 42 (10.8%)  | 10 (6.1%)   |
| Current < 15 cigs/d                   | 707 (3.1%)        | 690 (3.0%)        | 14 (2.9%)   | 29 (2.7%)   | 21 (2.9%)   | 1 (1.9%)   | 21 (5.4%)   | 2 (1.2%)    |
| Current 15 or more cigs/d             | 2,038 (8.8%)      | 1,438 (6.2%)      | 21 (4.3%)   | 55 (5.1%)   | 37 (5.1%)   | 3 (5.6%)   | 31 (7.9%)   | 3 (1.8%)    |
| Unknown                               | 85 (0.4%)         | 84 (0.4%)         | 2 (0.4%)    | 4 (0.4%)    | 5 (0.7%)    | 1 (1.9%)   | 5 (1.3%)    | 0 (0.0%)    |
| <b>Physical activity (MET hrs/wk)</b> |                   |                   |             |             |             |            |             |             |
| <10                                   | 4,735<br>(20.5%)  | 4,352<br>(18.7%)  | 78 (16.1%)  | 163 (15.2%) | 128 (17.7%) | 8 (14.8%)  | 95 (24.4%)  | 45 (27.6%)  |
| 10-49.9                               | 9,066<br>(39.2%)  | 9,883<br>(42.4%)  | 183 (37.8%) | 482 (44.9%) | 324 (44.9%) | 29 (53.7%) | 127 (32.6%) | 51 (31.3%)  |
| ≥50                                   | 4,089<br>(17.7%)  | 3,963<br>(17.0%)  | 124 (25.6%) | 214 (19.9%) | 137 (19.0%) | 10 (18.5%) | 53 (13.6%)  | 10 (6.1%)   |
| Unknown                               | 5,226<br>(22.6%)  | 5,125<br>(22.0%)  | 99 (20.5%)  | 215 (20.0%) | 133 (18.4%) | 7 (13.0%)  | 115 (29.5%) | 57 (35.0%)  |

Numbers shown are mean (SD) or number (%).

It is made available under a [CC-BY 4.0 International license](https://creativecommons.org/licenses/by/4.0/).

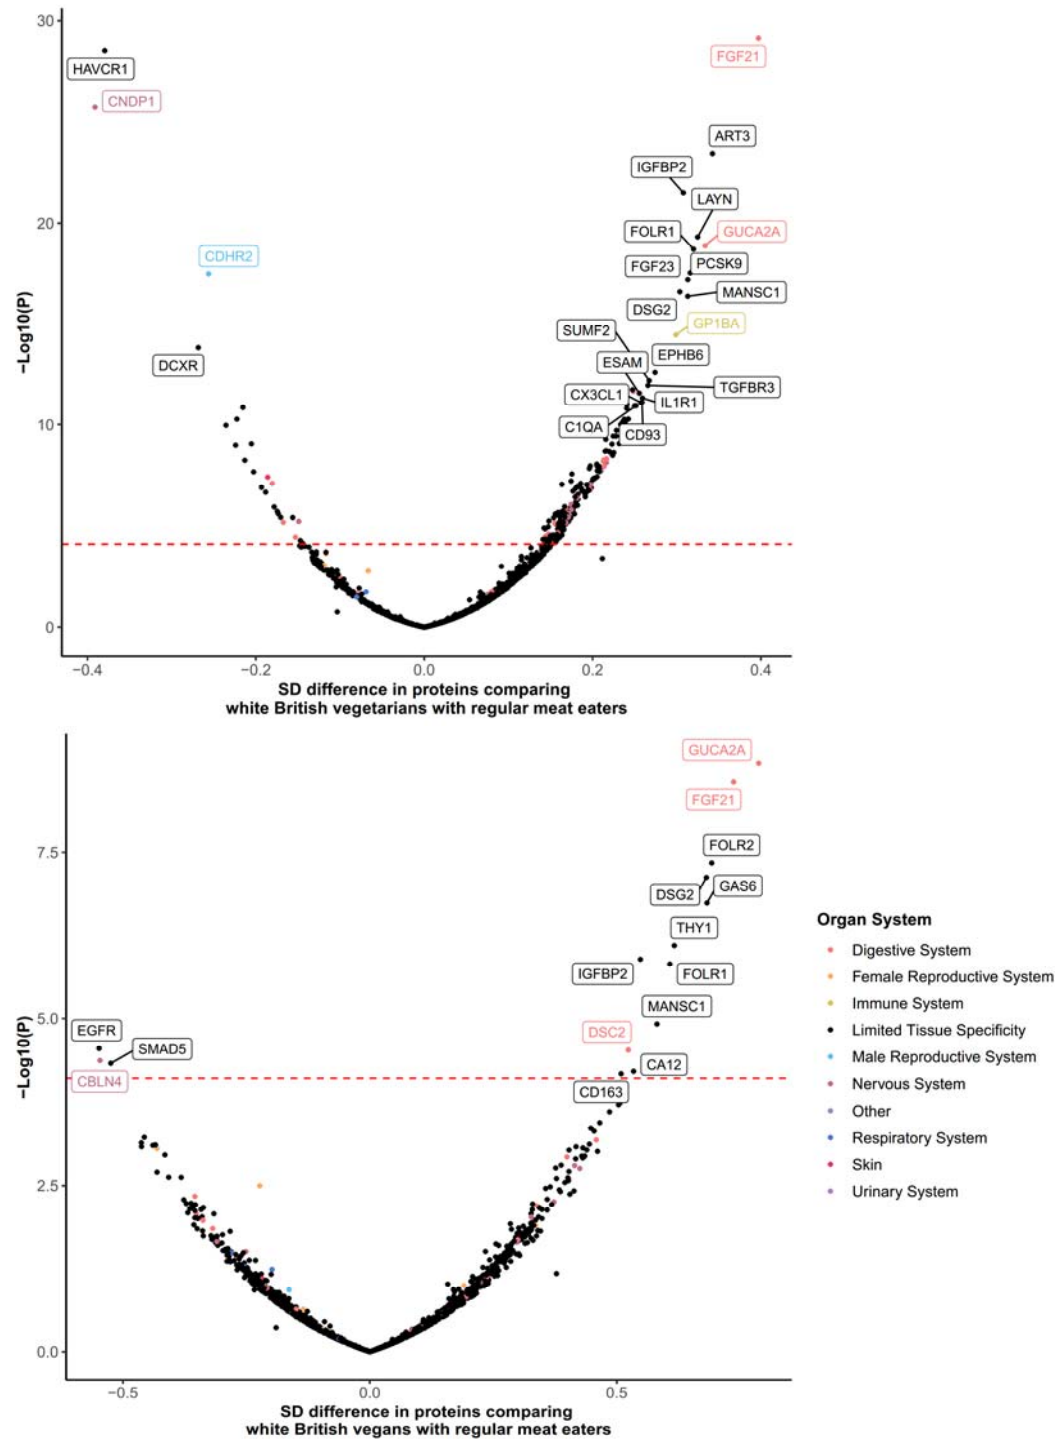

**Figure 1:** Volcano plots of proteins in white British vegetarians (top) and vegans (bottom) compared with regular meat eaters.

The red dotted line signifies  $p$ -value threshold for statistical significance. Each dot represents one protein, which were colour-coded by whether the protein is majority expressed (>50%) in one tissue type. Results were based on the multivariable model adjusted for age at recruitment, sex, region, fasting status, body mass index, alcohol consumption, smoking status and physical activity.

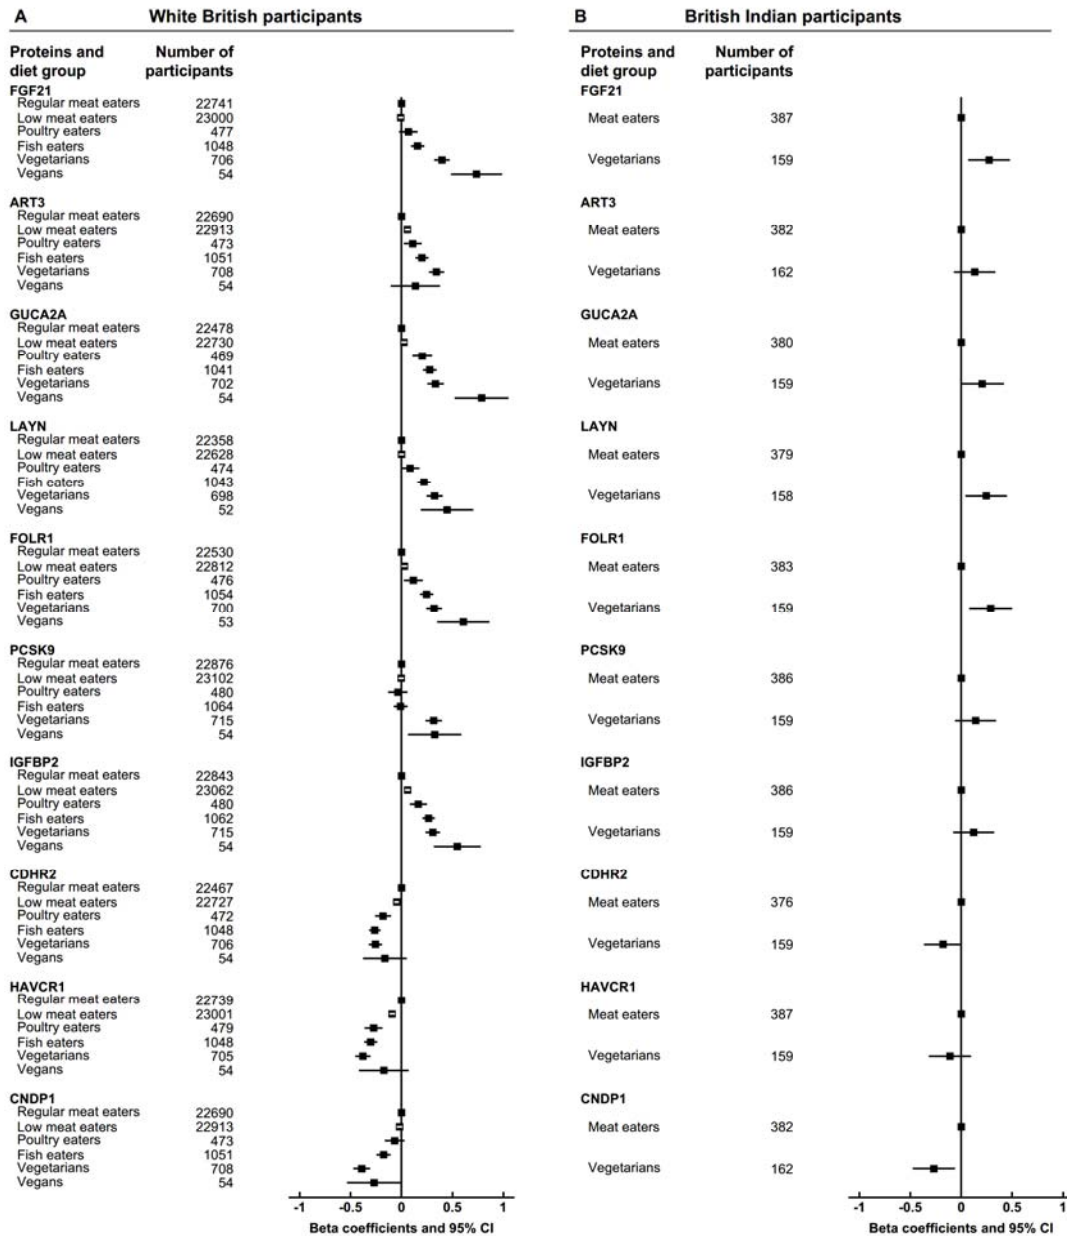

**Figure 2:** Top 10 proteins in vegetarians by diet group and ethnicity.

The top 10 proteins were selected by ranking the *p*-values of proteins comparing white British vegetarians with regular meat eaters, and sorted by betas in white British vegetarians, where the betas represent SD differences. Results were based on the multivariable model adjusted for age at recruitment, sex, region, fasting status, body mass index, alcohol consumption, smoking status and physical activity.

It is made available under a [CC-BY 4.0 International license](https://creativecommons.org/licenses/by/4.0/).

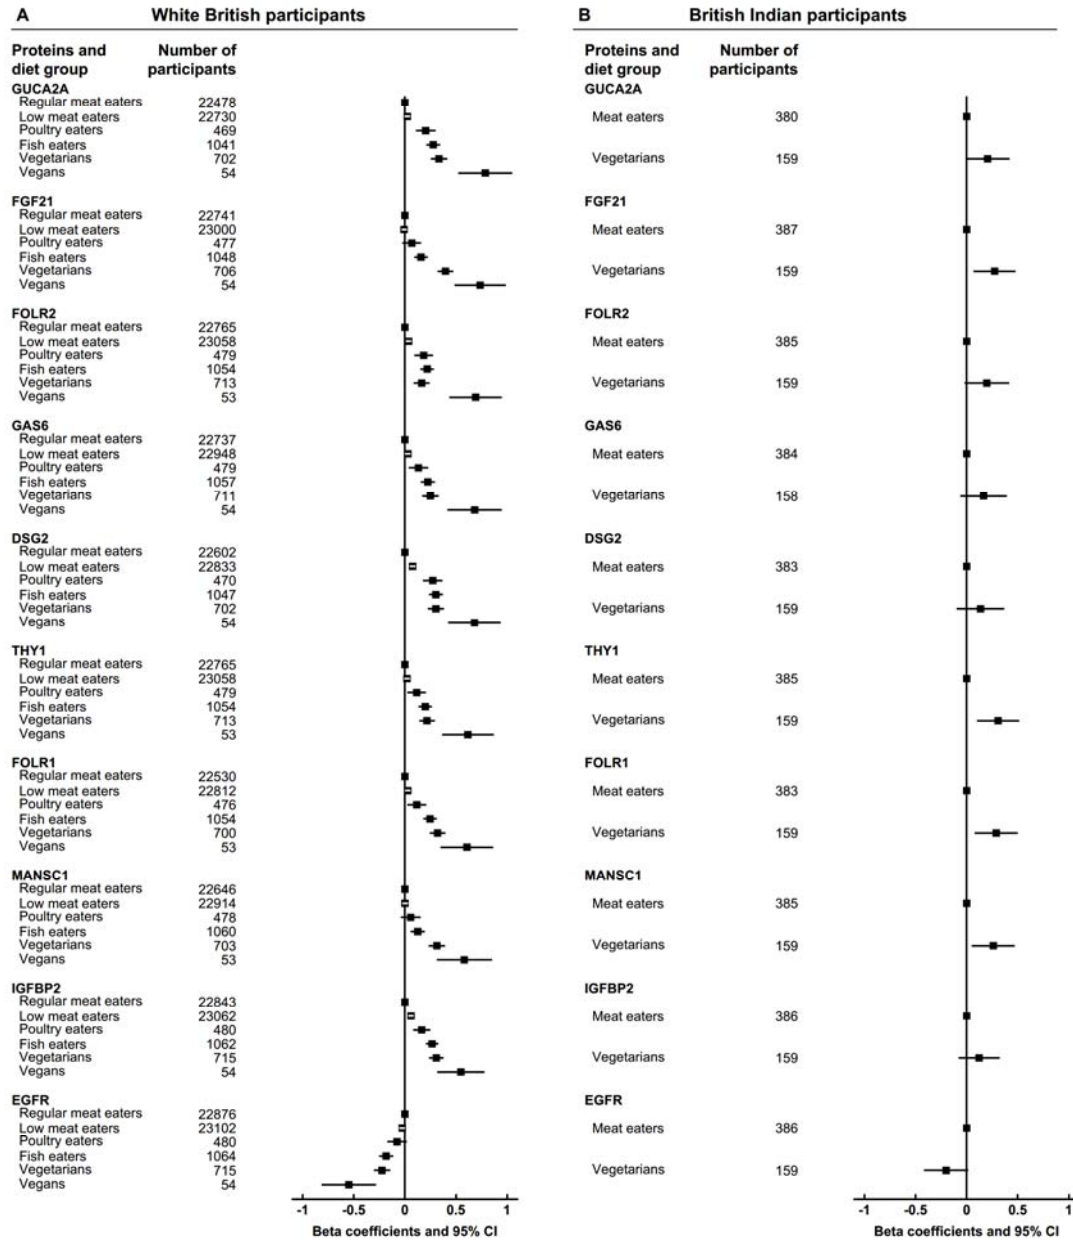

**Figure 3:** Top 10 proteins in vegans by diet group and ethnicity.

The top 10 proteins were selected by ranking the *p*-values of proteins comparing white British vegans with regular meat eaters, and sorted by betas in white British vegans, where the betas represent SD differences. Results were based on the multivariable model adjusted for age at recruitment, sex, region, fasting status, body mass index, alcohol consumption, smoking status and physical activity.
